# Supplementary material
Source: publisher figshare collection journal article supplement (https://aacr.figshare.com/ndownloader/files/39931301)
Supplement: Supplementary file 1 [file 39931301]

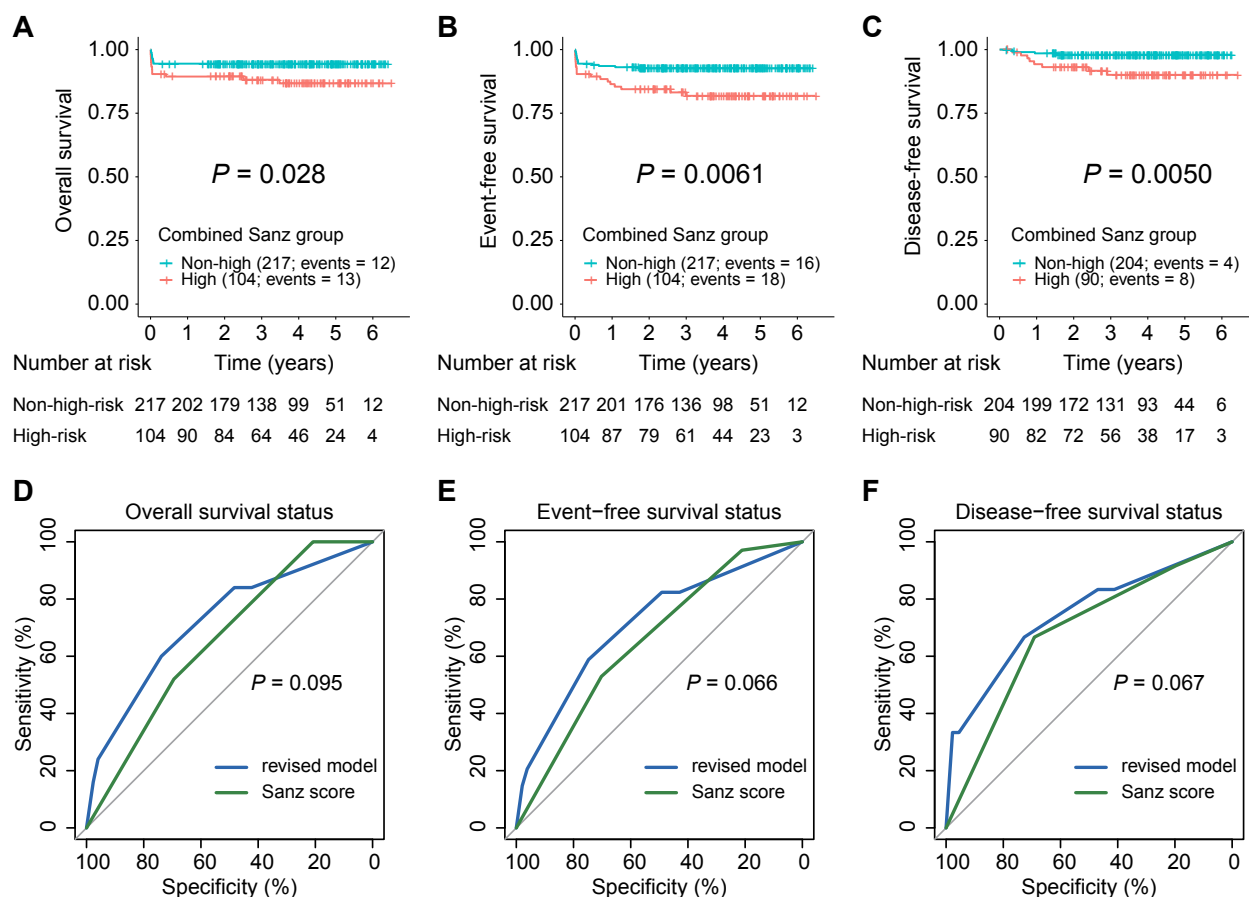

**Figure S15. Kaplan–Meier plots of Combined Sanz groups and ROC plots between the Sanz score and the revised risk score.** Kaplan–Meier estimates of OS (A), EFS (B), and DFS (C) when combining the Sanz low- and intermediate-risk into a single category. Comparison of the OS (D), EFS (E), and DFS (F) ROC curves between the Sanz score and the revised model score. *P*-value is calculated using the log-rank test. OS, overall survival; EFS, event-free survival; DFS, disease-free survival; ROC, receiver operating characteristic.
